1 Title: Neuromotor Prosthetic to Treat Stroke-Related Paresis

2  
3 Authors: Mijail D. Serruya<sup>1\*</sup>, Alessandro Napoli<sup>1</sup>, Nicholas Satterthwaite<sup>1</sup>, Joseph Kardine, Jr<sup>2</sup>, Joseph McCoy<sup>2</sup>,  
4 Namrata Grampurohit<sup>3</sup>, Kiran Talekar<sup>4</sup>, Devon Middleton<sup>4</sup>, Feroze Mohamed<sup>4</sup>, Michael Kogan<sup>5</sup>, Ashwini Sharan<sup>5</sup>,  
5 Chengyuan Wu<sup>5</sup>, Robert Rosenwasser<sup>5</sup>

6  
7 <sup>1</sup> Department of Neurology, Thomas Jefferson University, Philadelphia, PA 19107

8 \* Corresponding author: [Mijail.Serruya@jefferson.edu](mailto:Mijail.Serruya@jefferson.edu)

9 <sup>2</sup> Jefferson Rehabilitation (Outpatient), Thomas Jefferson University Hospital, Philadelphia, PA 19107

10 <sup>3</sup> College of Rehabilitation Science, Thomas Jefferson University, Philadelphia, PA 19107

11 <sup>4</sup> Department of Radiology, Thomas Jefferson University, Philadelphia, PA 19107

12 <sup>5</sup> Department of Neurosurgery, Thomas Jefferson University, Philadelphia, PA 19107

13  
14 ABSTRACT

15  
16 Background

17 Functional recovery of independent arm movement typically plateaus within six months following a stroke, leaving  
18 survivors with chronic deficits. This feasibility study tested whether a wearable, powered exoskeletal orthosis,  
19 driven by a percutaneous, implanted brain-computer interface (BCI), using the ensemble activity of individual  
20 neurons in the precentral gyrus in the affected cortical hemisphere, could restore voluntary upper extremity function  
21 in a chronic hemiparetic stroke survivor.

22  
23 Methods

24 One chronic hemiparetic stroke survivor with moderate-to-severe upper-limb motor impairment used a powered  
25 wearable elbow-wrist-hand orthosis that opened and closed the affected hand using cortical activity from the  
26 affected hemisphere with imagined hand movements. The system was evaluated in a home setting for 12 weeks.  
27 Motor function was evaluated before, during, and after the treatment.

28  
29 Results

30 Robust single unit activity was present throughout the precentral gyrus areas implanted for the duration of the study.  
31 Although abnormal oscillations, that appeared to correlate with contralateral spasticity, were present, the participant  
32 was able to acquire voluntary control over a hand-orthosis BCI based upon ensemble single unit activity and high  
33 frequency local field potential power. The study participant (C2) was able to achieve a maximum score of 10 points  
34 on the Action Research Arm Test (ARAT) while using the BCI system as compared to 0 without any device, and 5  
35 using only myoelectric control. Orthosis-powered hand-opening was faster with BCI-based control as compared to  
36 myoelectric control, likely due to the fact that BCI-control could be deployed without triggering abnormal spasticity  
37 inevitably reinforced by myoelectric control.

38  
39 Conclusions

40 The findings demonstrate the therapeutic potential of an implantable BCI system targeting the affected hemisphere,  
41 to “electrically bypass” the stroke, in this n-of-1 pilot study. The participant’s ability to rapidly acquire voluntary  
42 control over otherwise paralyzed hand opening, more than 18 months after a subcortical stroke, lays the foundation  
43 for a fully implanted movement restoration system that could restore independent arm function to stroke survivors.

44  
45 INTRODUCTION

46  
47 Stroke is a leading cause of disability <sup>1</sup> with a global prevalence of over 42 million people in 2015 <sup>2</sup>, with over four  
48 million adults in the United States alone with 800,000 new cases per year <sup>3</sup>. Stroke leads to permanent motor  
49 disabilities in 80% of cases <sup>4</sup>, and half of stroke survivors require long term care. Brain computer interface (BCI)  
50 technologies offer a potential solution to restore functional independence and improve health in people living with  
51 its effects. In the past decade, intracortical BCI technology has continued to advance, with multiple groups  
52 demonstrating the safety and efficacy of this approach to derive control signals <sup>5-7</sup>. In parallel, wearable robotic  
53 orthosis technology has evolved into FDA-cleared devices bringing concrete benefits to patients with weakened  
54 limbs <sup>8,9</sup>. This single-patient pilot clinical trial sought to leverage these two neurotechnology trends to investigate the  
55 functionality of a commercially available powered arm orthosis linked to the person’s cerebral cortex in an adult  
56 with chronic stroke.

57  
58 Electromyographic control of powered orthosis or electrical stimulation, has proven problematic either because users  
59 could not generate sufficient activity, or because voluntary activation of those recorded muscles was opposed by the  
60 stimulator's effects<sup>10</sup>. Contralaterally controlled electrical stimulation- where activity from the intact arm triggers  
61 stimulation on the paretic arm- appears to be a promising therapeutic intervention to improve function in the weaker  
62 limb<sup>11</sup> but it is not clear how it could be generalized to continuously-worn devices to enable the arms to move  
63 independently. Several groups have explored scalp EEG to derive control signals to drive robotic braces, and in one  
64 case, FES<sup>8,12-14</sup>. While using EEG-derived signals may be promising for rehabilitation therapy settings, it would not  
65 be feasible for daily independent function. Namely, scalp EEG requires careful electrode positioning by a trained  
66 technician, while skin sweat and hair can cause impedances to fluctuate, thus compromising signal quality. Daily  
67 application of even a subset of contacts to the same skin sites can lead to skin breakdown and potentially fatal cellulitis.  
68 Given the major factor limiting the ability of orthoses and FES to restore more complex movement is the derivation  
69 of a control signal, intracortical interfaces offer a potential solution since the brain is itself the ultimate origin of such  
70 signals in healthy adults.

71  
72 Notably, intracortical neuromotor prosthetics have not been tested in people with strokes above the mesencephalon.  
73 A proof-of-concept that a brain-computer interface, based on arrays implanted in healthy cortex above a subcortical  
74 stroke, could restore behaviorally useful independent, voluntary movement, could lead to the development of a fully  
75 implantable medical device that, in principle, could reverse the motor deficits caused by stroke, and ultimately other  
76 lesional diseases such as tumors, multiple sclerosis, and arteriovenous malformations. This approach of using adjacent  
77 healthy cortex could also be expanded to restore non-motor functions, including language, memory, perception and  
78 executive function.

## 79 80 METHODS

81  
82 Approval for this study was granted by the US Food and Drug Administration (Investigational Device Exemption)  
83 and the Thomas Jefferson University Institutional Review Board. The participant described in this report has provided  
84 permission for photographs, videos and portions of his protected health information to be published for scientific and  
85 educational purposes. After completion of informed consent, medical and surgical screening procedures, two  
86 MultiPorts (Blackrock Microsystems, UT), each comprising two 8x8 microelectrode arrays tethered to a titanium  
87 pedestal connector, were implanted into the cortex of the precentral gyrus using a pneumatic insertion technique<sup>15,16</sup>.  
88 Details of the human surgical procedure are in preparation for publication. Selection criteria are available online (see  
89 Clinicaltrials.gov, number NCT03913286). The trial was designed with the implantation phase to last a maximum of  
90 three months (Fig. 1).

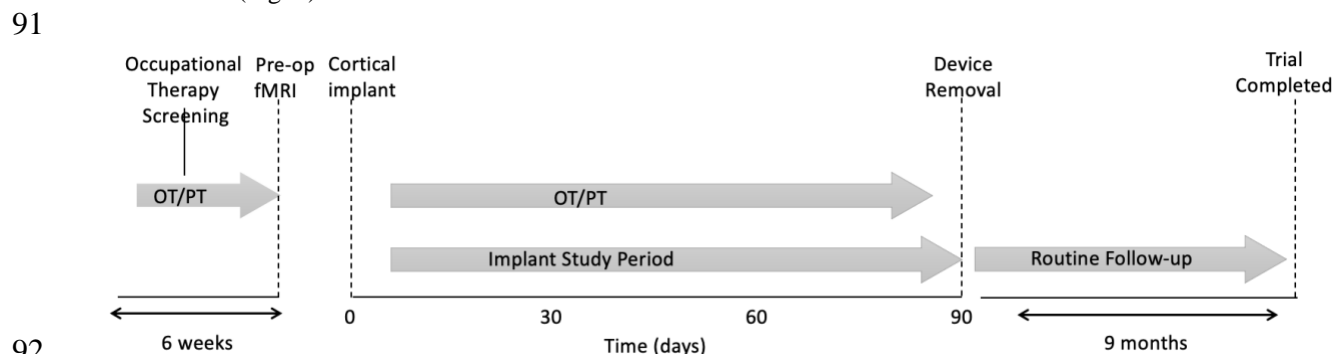

**Figure 1. The clinical trial timeline.**

*Participant.* The participant (ID number C2) was a right-handed male who experienced right hemispheric stroke, manifest as acute onset dense left hemiparesis and expressive aphasia, at which time he was age between ages 35 to 40. Due to unknown time of onset and hypertension at presentation, the participant was not a candidate for thrombolysis. CT angiogram showed occlusion of the right posterior cerebral artery and high-grade stenosis of the left posterior cerebral artery in the proximal P2 segment. MRI of the brain showed acute infarcts in the right basal ganglia/corona radiata and right occipital lobe. He was started on dual antiplatelet therapy for 3 weeks and then was transitioned to aspirin 81 mg once daily, along with atorvastatin and anti-hypertensives. He had left-sided

102 hemiparesis, dysphagia, left homonymous hemianopsia and dense left visual neglect and was transferred to rehab  
103 hospital for supervised therapies. He subsequently underwent two months of intensive inpatient rehabilitation and  
104 aphasia and dysphagia resolved; he gradually acquired the ability to ambulate independently, albeit with a persistent  
105 left foot drop. Neuroimaging showed evidence of multi-focal strokes, and prior silent strokes. The participant had  
106 previously been in good health and did not have any known stroke risk factors such as diabetes or smoking. There  
107 was a history of loud snoring and the participant had not been evaluated for obstructive sleep apnea. Transthoracic  
108 and transesophageal echocardiography were normal as were serial hypercoagulability panels; the participant was  
109 adopted and the biological family history unknown. The participant was deemed to have had embolic strokes of  
110 unknown source (ESUS). Although serial electrocardiography since the stroke was normal, the participant is being  
111 scheduled for a loop recorder to survey for possible paroxysmal atrial fibrillation. The participant had learning  
112 disabilities and was presumed to have had mild cognitive impairment prior to the stroke. Screening formal  
113 neuropsychological testing identified significant neurocognitive problems (full scale IQ 59) and also concluded that  
114 the participant remained fully capable to provide proper informed consent and to participate in this trial, meeting its  
115 demands and requirements. The participant provided both verbal and written informed consent, both to participate in  
116 the trial and to share his identifying information with the public. He had been working full time at the time of the  
117 stroke and had been unable to return to work since the stroke.

118  
119 *Pre-operative fMRI.* The participant underwent MRI on a 3T Philips Ingenia MRI scanner (Amsterdam, The  
120 Netherlands). A 1mm isotropic 3-D T2 FLAIR was obtained for structural localization. A single-shot echoplanar  
121 gradient echo imaging (EPI) sequence with 80 volumes, repetition time (TR) = 2 s, echo time (TE) = 25 msec, voxel  
122 size = 3 x 3 mm<sup>2</sup>, slice thickness = 3mm, axial slices = 37. *Motor Task:* The participant was asked to visualize  
123 movements of his paretic left hand during the MRI. Each motor trial consisted of a block design featuring a 20 s rest  
124 block and a 20 s active block repeated. This block design was repeated between 4-6 times for a total of 160-240 s  
125 scans. Visual stimulus comprised a 20 s video depicting two 3D modeled limbs at rest, followed by a 20 s video of  
126 the limb(s) performing the desired motor task. Motor tasks were designated “hand” (repeated hand open/clench) and  
127 “arm” (repeated arm extension/elbow), and classified as “active” (participant performed or attempted to perform the  
128 motion) or “passive” (physician manually moved participant’s hand/arm). Hand motor was performed as bilateral-  
129 active, paretic-active, and paretic-passive. Arm motor was performed as paretic-active and paretic-passive. In active  
130 tasks, the participant was instructed to follow the movements in the video or concentrate on following in the case of  
131 the paretic limb. Task choice and prioritization was based on pre-exam training and examination of participant’s  
132 capabilities and examination of BOLD activation observed during the scan. For example, a breath-hold challenge was  
133 employed after the first couple of tasks failed to show desired activation with an attempt to improve cerebrovascular  
134 reactivity. BOLD activation subsequently became apparent. Post processing of the BOLD data including motion  
135 correction, smoothing, and general linear model (GLM) estimation was performed using SPM software  
136 ([www.fil.ion.ucl.ac.uk/spm](http://www.fil.ion.ucl.ac.uk/spm)) as well as Nordic brain EX software (NordicNeuroLab, Bergen, Norway). After BOLD  
137 post-processing, generated statistical maps were overlaid on the 3D T2 FLAIR image for visualization of activation.

138  
139  
140 *Cortimo system.* ‘Cortimo’ is the designation  
141 provided to the FDA to represent the overall  
142 system (Fig. 2) that comprised two percutaneous  
143 Multiports (Blackrock Microsystems, Inc), each  
144 in turn having two multi-electrode array sensors,  
145 the cabling, amplifiers, software and the powered  
146 MyoPro orthosis (described subsequently). Each  
147 sensor is an 8x8 array of silicon microelectrodes  
148 that protrude 1.5 mm from a 3.3 x 3.3-mm  
149 platform. At manufacture, electrodes had an  
150 impedance ranging between 7 KOhm and 34  
151 KOhm. The array was implanted onto the surface  
152 of the MI arm/hand region following pre-  
153 operative fMRI; with electrodes penetrating into  
154 the cortex to attempt to record neurons in layer V.  
155 Recorded electrical signals pass externally  
156 through a Ti percutaneous connector, which is

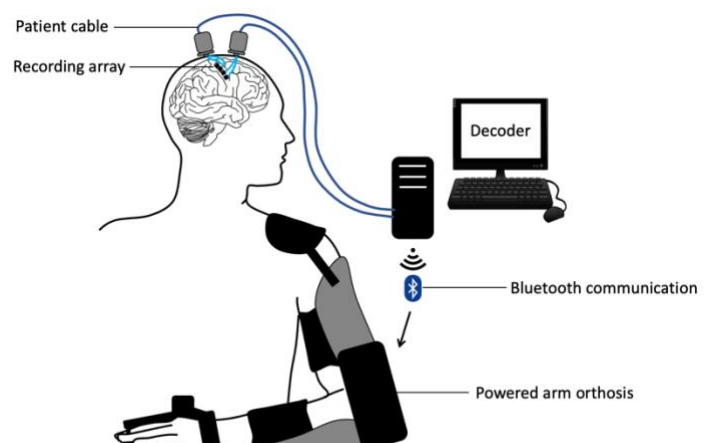

**Figure 2. The Cortimo system.** The overall device comprises two Multiports, each with two 8x8 microelectrode arrays, patient cables linked to external amplifiers, a decoding computer and a wearable, powered arm orthosis.

157 secured to the skull. Cabling attached to the connector during recording sessions routes signals to external amplifiers  
158 and then to a series of computers in a cart that process the signals and convert them into different outputs, such as  
159 servo motor position of the MyoPro brace or screen position of a neural cursor that can be viewed by the participant  
160 on a computer monitor. Currently, the system must be set up and managed by an experienced technician.

161  
162 *MyoPro brace.* The MyoPro (Myomo, Inc, Cambridge, MA) is an FDA-cleared myoelectric powered arm orthosis  
163 designed to support a paretic arm <sup>9</sup>. The rigid brace incorporates metal contacts attached to soft straps that can be  
164 adjusted such that contacts rest on the biceps and triceps proximally, and on wrist flexors and extensors distally, on  
165 the paretic upper extremity. The sensors continuously record the root mean square of underlying muscle activity.  
166 Thresholds are manually set using software such that signals exceeding them will trigger one of the MyoPro motors.  
167 Because the participant retained residual elbow flexion and extension strength, the motor at the elbow was set up such  
168 that biceps activation triggered elbow flexion and triceps activation triggered elbow extension. For hand opening, the  
169 MyoPro was set up to either use myoelectric control, or to use BCI-based control. Since the participant was unable to  
170 voluntarily extend the wrist or open the fingers, the myoelectric mode was set up such that the default state was with  
171 the hand open, and it would only be closed by activating enough wrist flexor activity.

172  
173 *Recording sessions.* Research sessions were scheduled five days per week at a temporary residence, adjacent to the  
174 hospital, provided to the participant. Sessions could be cancelled (for example, due to participant request or schedule  
175 conflict) or ended early at the participant's request. Sessions would commence with neural recording and spike  
176 discrimination. While initial sessions included filter building and structured clinical end-point (cursor control) trials,  
177 in the final month of the trial, "training-less" algorithms were used with the participant proceeding directly to BCI-  
178 controlled hand action as soon as the patient cables were connected. Performance of computer tasks, orthosis control  
179 and occupational therapy exercises followed. The electrodes and neural signals selected immediately before filter  
180 building remained constant for any given session's orthosis control trials.

181  
182 *Spike discrimination.* Units were extracted using an automatic thresholding approach based on Root Mean Squared  
183 multipliers. Namely, for each channel a detection threshold was set to  $-4.8 \times$  channel RMS at the beginning of each  
184 recording session, while the subject was at rest. Before spike extraction, the continuous voltage signals sampled at 30  
185 KHz were high-pass filtered using a 4<sup>th</sup> order Butterworth filter with cutoff frequency set to 250 Hz. At the beginning  
186 of each recording session, the quality of the extracted spike waveforms was manually validated by a technician using  
187 a real-time display of the triggered spike waveforms provided by the Central software (Blackrock Microsystems, UT).  
188 We did not perform any type of spike sorting and applied no objective criteria to determine whether any particular  
189 unit (or admixture of units) recorded on one day was the same as that recorded on a subsequent day. Smaller amplitude  
190 signals likely comprised a combination of spikes from multiple neurons.

191  
192 *Decoder Filter Building.* For each session, single and multiunit data or high frequency (100-1000 Hz) local field  
193 potentials derived from multiple channels (20-30) were used to create a linear filter to convert these real-time  
194 multidimensional neural features into either a one or a two-dimensional (position or velocity) output signal. During  
195 the course of the trial, a variety of motor activity and motor imagery approaches were tested for filter building,  
196 including imagining opening and closing the paretic hand, passively flexing and extending the elbow, passively  
197 opening and closing the hand, and simply observing the cursor moving up and down without any specific instruction.  
198 The training data for building the linear filter were collected with the participant gazing at a screen where a target  
199 cursor was moved slowly up and down for one minute. After this preliminary filter was built, a new 1-minute re-  
200 training session was performed, this time the manually controlled target cursor was accompanied by a prediction  
201 cursor that was neurally controlled by the participant. Using this additional training set, a second filter was built and  
202 then tested on a simple target acquisition game in which the y-position of the predicted output was discretized into  
203 zones such that positions on the upper part of the screen would cause an animation sprite to move up by a fixed  
204 amount, and positions on the lower part of the screen would cause the sprite to move down by a fixed amount.

205  
206 *BCI Orthosis use.* The discrete output was then used to control the aperture of the hand via the MyoPro's hand brace  
207 motor. The up-down mapping on the screen was translated into closed-open positions of the hand. The participant  
208 then performed a series of functional tasks including grasping and then dropping an object, the Action Research Arm  
209 Test <sup>17</sup>, and a variation on Jebsen Taylor item moving test <sup>18</sup>. These were tested with both the participant seated and  
210 standing.

211  
212 *“Training-less” Mapping.* During certain sessions, the participant was able to effortlessly adapt the continuous cursor  
213 control on to hand open-close control. During other sessions, however, the participant could not achieve this ‘efferent  
214 remapping,’ and would attempt to overpower the orthosis motors with residual finger flexion strength. A novel  
215 ‘training-less’ approach was deployed in which a rolling 1-second baseline of the LFPs signals from the most  
216 neuromodulated 20 channels was used to calculate spectral power in the high gamma band (100-500 Hz). Namely, 1-  
217 second long LFP continuous voltages were used for computing the average spectral density estimation in the frequency  
218 band 100-500 Hz, using non-overlapping frequency bins with a 50Hz width. Spectral density was computed using the  
219 Matlab built-in periodogram method. Spectral values were updated every 500 ms, using 1-second-long rolling  
220 windows with 50% overlap. Finally, these real-time spectral features derived from the 20 most neuromodulated  
221 channels were averaged across channels to produce a single high gamma band value for each 500 ms software update.  
222 Orthosis hand-closure would be triggered by an increase in this mean spectral power from the resting baseline ranging  
223 between 0.5 and 3 V<sup>2</sup>/Hz to values greater than 10 V<sup>2</sup>/Hz, where real-time values above this threshold would make  
224 the hand motor close.

225  
226 *Concomitant Occupational and Physical Therapy.* Since being discharged from acute rehabilitation 60 days after the  
227 initial stroke, the participant enrolled in outpatient physical and occupational therapy. Prior to the device implantation,  
228 the participant completed a six-week course of occupational therapy (two to three sessions per week) intended to be a  
229 screening phase to assess the participant’s ability to wear and use the MyoPro device with myoelectric control and  
230 follow complex instructions. Following device implantation, the participant continued occupational therapy, twice per  
231 week, and physical therapy, once per week. Occupational therapy focused on postural training while seated and  
232 walking, donning and doffing the MyoPro, and using the MyoPro for functional activities. Timed functional electrical  
233 stimulation (e.g., pincer grasp programs; XCite, from Restorative Therapies, Inc, Baltimore, MD) and vibration  
234 therapy were used for spasticity management both pre- and post-operatively. Physical therapy exercises included  
235 scapular mobilization, progressive range of motion, weight bearing, forced use with game-related activities to  
236 encourage left UE volitional control, aerobic endurance exercise. Broadly, the therapeutic goal was to encourage  
237 volitional control outside of the abnormal synergistic patterns while varying postural stability.

## 238 239 RESULTS

240  
241 The participant underwent intracortical implantation in autumn of 2020 and explantation three months later on January  
242 2021, in accordance with the intended 3-month duration of the trial. Over the course of the study, the participant had  
243 three minor, and one serious, device-related adverse events, all of which were treated, resolved, and reported to the  
244 governing regulatory bodies. The serious adverse event was the development of a scalp infection at the left pedestal  
245 site one week prior to the device removal date, despite a regimen of topical antibiotics and regular cleaning. The left  
246 pedestal site had posed a challenge since the time of the initial surgery as it was not possible to exactly re-approximate  
247 the skin flap leaving the base of the pedestal exposed. This area was protected and eventually granulated and grew  
248 new skin. The participant was afebrile and asymptomatic, and the infection was detected only by close visual  
249 inspection. The participant was treated with twice daily amoxicillin/clavulanic acid for the 7 days prior to the device  
250 removal. Pedestal site skin cultures taken at device removal revealed pansensitive *staphylococcus lugdunensis* and  
251 *staphylococcus capitis*, and yeast, and appropriate antibiotic treatment was provided. No organisms grew from cultures  
252 taken of the bone adjacent to the pedestals. The only macroscopic evidence of infection at device removal was a small  
253 area (~ 2 cm<sup>3</sup>) of erythema and friable tissue at the skin adjacent to the right pedestal. The participant was discharged  
254 home. The participant remains in the Cortimo trial both for ongoing neurosurgical follow-up and surveillance, and to  
255 track any further performance improvements in myoelectric MyoPro use with ongoing outpatient occupational  
256 therapy.

257  
258 *Preoperative anatomic and functional neuroimaging.* Preoperative imaging revealed the old infarct in right lentiform  
259 nucleus and adjacent white matter including corona radiata and a portion of the posterior limb of the internal capsule,  
260 along with a large old right PCA infarct, progressed since the acute stroke imaging MRI from 2019 (Fig. 3). In  
261 addition, a small region of bandlike signal abnormality involving subcortical white matter and medial aspect of hand  
262 knob region of right precentral gyrus was identified, likely reflecting retrograde neuronal degeneration, (which  
263 influenced the clinical decision for the implant placement). On DTI, there was extensive loss of fractional anisotropy  
264 in the region of right corticospinal tract from old infarct. The “imagined” left hand motor paradigm and passive

265 elbow/forearm motor paradigm were  
266 diagnostic with good concordance. When  
267 gross motor movements did not cause any  
268 BOLD signal change, instructions to the  
269 participant were altered to have him hold his  
270 breath for several seconds (hypercapnia  
271 challenge). Subsequently a marked BOLD  
272 signal was evident at the precentral gyrus. The  
273 brief breath-holding presumably allowed  
274 relatively increased carbon dioxide retention  
275 (relative respiratory acidosis) that in turn  
276 induced mild cerebral vasodilatation  
277 facilitating BOLD signal acquisition (in this  
278 subject with underlying vascular abnormality  
279 as a cause of his multiple strokes). On the  
280 "imagined" left hand motor paradigm,  
281 activation was noted in the expected location  
282 along central sulcus involving lateral aspect of  
283 the hand knob region of the precentral gyrus  
284 and the adjacent portion of postcentral gyrus  
285 (Fig. 3c). On the passive left elbow/forearm  
286 motor paradigm, activation was seen along  
287 central sulcus which shows good concordance  
288 with the "imagined" motor task as discussed  
289 with a slightly more posterior and superior  
290 extension of activation reflecting the  
291 prominent sensory component of this passive  
292 motor paradigm. A 3D brain model was  
293 printed using the 3D FLAIR sequence to allow  
294 for 3D visualization of the surgical field for more accurate pre-operative planning (Fig. 3d).

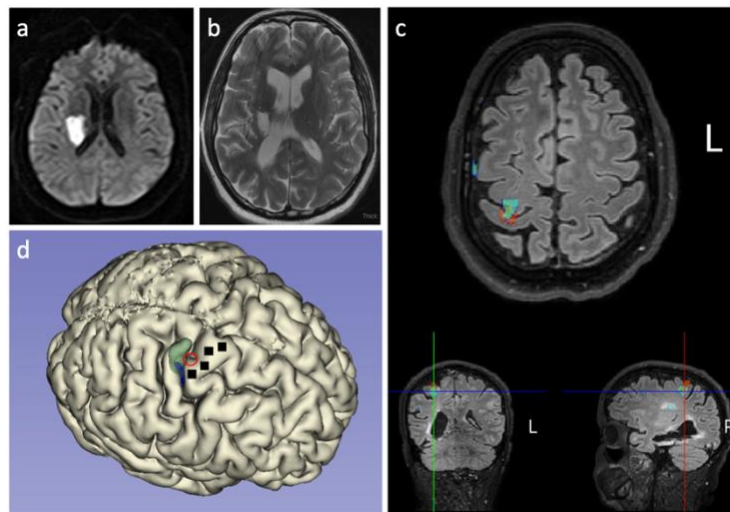

**Figure 3. Neuroimaging results.** Diffusion sequence from MRI scan on January 19, 2019 when the acute stroke occurred; diffusion restriction is evident in the right lentiform nucleus and adjacent white matter (a). T2-weighted MRI from January 22, 2021, shows areas of encephalomalacia and relative ventriculomegaly that have developed since the stroke (b). Functional neuroimaging revealed a hot spot of activation, indicated by a red circle, in the depth of the central sulcus along the 'hand knob' area of the precentral gyrus (c). A three-dimensional reconstruction of the participant's cortical surface derived from the MRI with the imagined left hand movement centroid of activity indicated by the red circle (d). The green shading indicates an area responsive to sensory stimulation of the left hand. The black squares indicate the location of the four microelectrode arrays.

296 *Neural recordings.* Well-delineated single units were recorded from 87 of the 256  
297 channels (Fig. 4). Neural activity correlated with actual and attempted movements  
298 in both the paretic left arm in addition to the intact right arm. The multi-electrode  
299 arrays that were recorded via the right pedestal connector were more lateral and  
300 posterior along the precentral gyrus and were closer to the centroid of fMRI  
301 imagined movement activation (Fig. 3c) and closer in absolute terms to the  
302 subcortical stroke. Although all four arrays were closely spaced along the  
303 precentral gyrus, cross-array discharge properties appeared to vary amongst them  
304 (Fig. 5). The discharge rate of various units appeared to correlate with specific  
305 residual actions, including the wrist extension that gradually developed in the  
306 course of the three-month duration (Fig. 6). By taking the spike counts recorded  
307 at each channel every 200 milliseconds and running them through a leaky  
308 integrator<sup>19</sup>, and then summing these leaky integrator outputs across all channels,  
309 we were able to visualize the cumulative cross-array firing rate activity in  
310 comparison to forearm electromyographic activity (Fig. 7). Of the 256 electrodes,  
311 in each session, we identified 20 to 40 channels that were eventually used for  
312 neural decoding. These channels were used for extraction of neural features (whether threshold crossing or spectral  
313 high-frequency power) that coded for hand and elbow flexion and extension. Two main decoding approaches were  
314 used: 1) A discrete two-class (hand opening/closing) classifier based on a 1-dimensional linear filter continuous  
315 output; 2) a "training-less" threshold crossing approach with a rolling baseline normalization, used to control hand  
316 closing or opening.

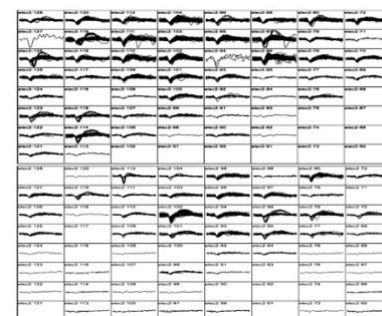

**Figure 4. Action potential waveforms.** Snapshot of action potential waveforms recorded from two of the arrays.

318 *Orthosis control.* The left upper extremity score on the Action Research Arm Test (ARAT)<sup>17</sup> was 0 without the  
319 orthosis on, 5 using the orthosis under myoelectric control, and 10 using the orthosis under direct brain-control. In one

320 component of the Jebsen-Taylor standardized test of hand  
321 function<sup>20</sup>, the goal is to pick up and move 5 cans, one at  
322 a time, a few inches away forward on the table (normal  
323 times are 3.23 seconds for empty soup cans in substest 6,  
324 and 3.30 seconds for full cans in substest 7). Because the  
325 design of the hand orthosis precluded the ability to grasp a  
326 soup can (i.e., the brace only supports the thumb and next  
327 two digits such that not all digits can be used for grasp and  
328 the fourth and fifth digit, since they remain tightly flexed,  
329 in fact physically block the can), the participant performed  
330 variations on the test. It took the participant 146 seconds to  
331 pick up, move and release 5 pill bottles using myoelectric  
332 control, and 95 seconds to perform the identical task under  
333 BCI control. Another task was to hold an object in the right  
334 hand (e.g., a stress ball or a whiteboard eraser) and place it  
335 into the paretic left hand, and then extend the left arm down  
336 towards the floor and drop the object into a bin; this  
337 process was then repeated 5 times in a row. Both these  
338 tasks were performed with the participant seated. On two  
339 trials of this pick-up-and-drop-5 in myoelectric mode, the  
340 participant's completion times were 128 and 222 seconds;  
341 on five trials of the same task in BCI mode, times were 81,  
342 106, 137, 214 seconds. In addition to measuring the total  
343 time to perform these grasp-move-release tasks, we also  
344 quantified the time it took to release an object once the  
345 hand was in the target position. Hand release times were  
346 faster under BCI control than myoelectric control ( $p=0.04$ ,  
347 two-sample t-test).

348  
349 **Motor outcomes.** Motor measures, performed  
350 when the participant was not connected to the  
351 BCI or wearing the MyoPro orthosis, were  
352 tracked over time and demonstrated that the  
353 implantation procedure did not decrease  
354 residual strength in the paretic left arm and  
355 left leg. In fact, muscle strength increased in  
356 the left arm. Whereas serial neurological  
357 exams since the time of the stroke  
358 demonstrated an absence of voluntary wrist  
359 extension or finger extension (0/5 on manual  
360 muscle testing, starting two months into the  
361 trial, the participant began to consistently  
362 exhibit voluntary wrist extension against  
363 gravity (3/5), and on a few occasions was able  
364 to voluntarily extend the fingers slightly (2/5)  
365<sup>21</sup>. One month prior to the device  
366 implantation, the Fugl-Meyer upper  
367 extremity score was 30 (out of a maximum of  
368 66) for the left upper extremity; this increased  
369 to a score of 36 four weeks after the two  
370 Multiports were implanted, and a score of 38  
371 seven weeks post-implantation<sup>22</sup>. Although  
372 the participant did not receive botulinum  
373 toxin injections, or receive any type of anti-  
374 spasticity medication, during the clinical trial,  
375 spasticity gradually decreased with time as

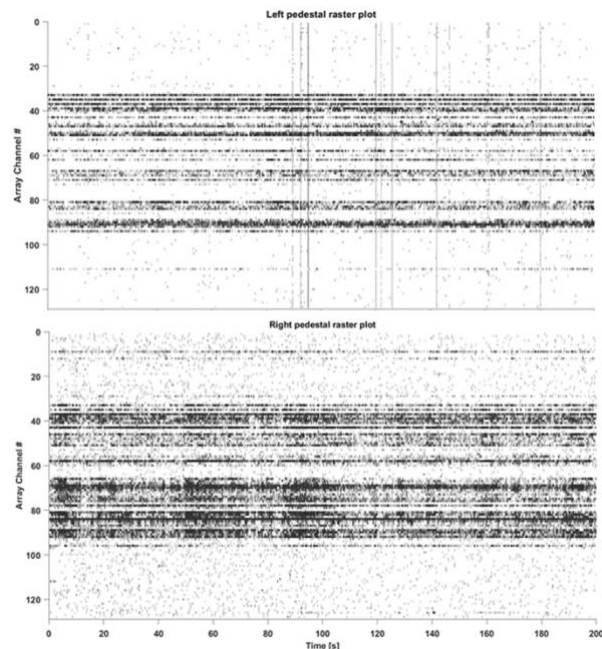

**Figure 5. Spike rasters derived from both pedestals (four arrays) in a 200-second example clip.** Recordings from the left pedestal (top panel) reflect activity recorded by the two arrays located more medially and dorsally along the precentral gyrus. Recordings from the right pedestal (bottom panel), reflect activity by the two arrays located more laterally along the precentral gyrus and closer to the stroke.

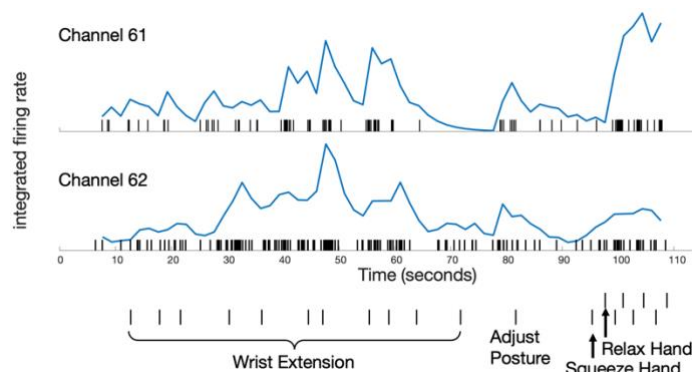

**Figure 6. Neuronal activity correlated with performed movements in the paretic limb.** Over a 110-s period, the participant was asked to perform a series of left limb movements (which are described on the abscissa). Movement instruction times, delivered as a verbal command, is indicated by a small vertical hash mark. Spiking activity of two simultaneously recorded units is displayed. Rasters indicate the time of each action potential. Normalized, integrated firing rates appear beneath each raster, as derived by the 'leaky integrator' equation described in<sup>19</sup>; normalization is achieved by dividing by the maximum integrated firing rate from each unit's spike train over the time period displayed. Although both units tend to discharge with wrist extension and hand squeezing, the top unit (channel 61) is relatively more active for hand squeezing than wrist extension, relative to the bottom, simultaneously recorded unit (channel 62). The participant performed all movements; however, such motions required effort and he was unable to engage a consistent level of activity for each cue, and also exhibited a variable reaction time to a given cue. The participant was easily fatigued, requiring him to take a break and then adjust his posture.

376 reflected in gradually decreasing numbers on serial measurements of the modified Ashworth scale for spasticity for  
377 passive flexion and extension movements of the fingers, wrist, and elbow, along with internal and external rotation of  
378 the shoulder<sup>23</sup>.  
379

## 380 DISCUSSION

381  
382 This pilot trial  
383 demonstrated that  
384 ensemble single unit  
385 activity remains active  
386 in ipsilesional cerebral  
387 cortex overlying  
388 chronic subcortical  
389 stroke. To our  
390 knowledge, this is the  
391 first report of  
392 intracortical recordings  
393 in ipsilesional cerebral  
394 cortex for a stroke  
395 above the  
396 mesencephalon. The  
397 trial established that  
398 activity can be decoded  
399 and mapped into

400 control over a powered  
401 orthosis to restore  
402 functionally useful  
403 voluntary upper  
404 extremity movement.  
405 Importantly, this brain-  
406 computer interface  
407 system can be used  
408 simultaneously with  
409 residual intact movement, in particular in a limb with a gradient of intact to absent voluntary movement. While  
410 myoelectric approaches based upon wrist flexion did enable voluntary hand opening, this approach triggered increased  
411 muscle tone that subsequently slowed orthosis use (as the motors were opposing the abnormal tone): the BCI control  
412 mode essentially bypassed this issue and allowed motors to operate more smoothly and quickly. Electromyographic  
413 recordings demonstrated that while the participant did continue to engage wrist flexors during BCI control, the  
414 amplitude was decreased from abnormally elevated levels to more normal amplitudes.

415  
416 This trial was not intended to restore voluntary motor control in the hemiparetic upper extremity in the absence of any  
417 device use, and even so, we found that strength improved, and spasticity decreased. At the very least, this suggests  
418 that the implantation of four microelectrode arrays into ipsilesional precentral gyrus cortex did not exacerbate pre-  
419 existing hemiparesis (i.e., it did not worsen weakness). One potential explanation for the participant's unexpected  
420 improvements in voluntary wrist and finger extension include mass practice (from regular physical and occupational  
421 therapy, with daily practice reinforced by clinical trial assistants), Although the use of an extension arm splint 8 hours  
422 each night, and the frequent use of an electric blanket to warm the paretic forearm, undoubtedly helped reduce  
423 spasticity and stretch flexor tendons, these interventions cannot account for the benefits as they had been in use for  
424 months prior to enrollment when serial measurements showed no improvements in manual muscle testing. Another,  
425 more speculative, explanation for the participant's improved forearm function is that the daily exercise of ipsilesional  
426 cortical activity for BCI-orthosis control, promoted a plasticity driven response to either normalize or compensate for  
427 abnormal motor synergies.

428

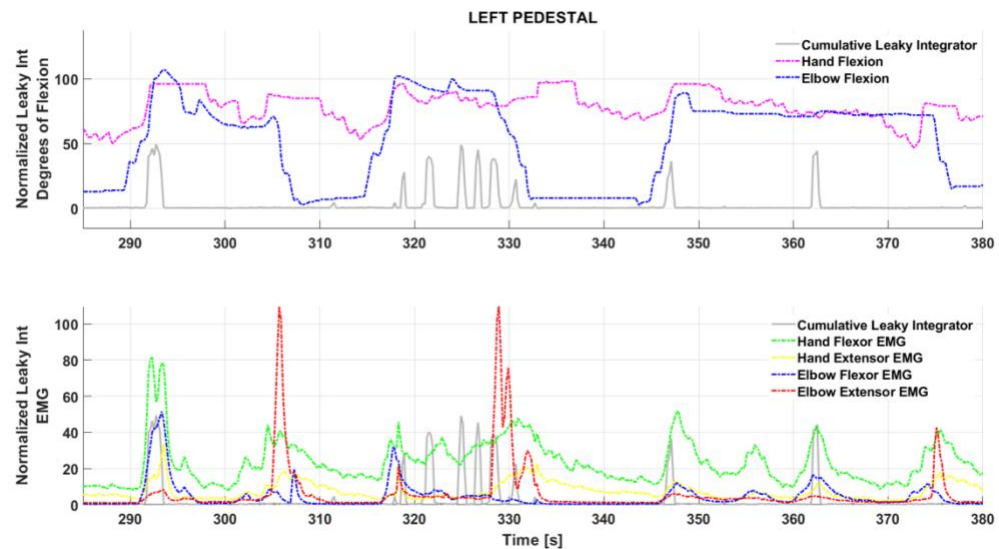

**Figure 7. Cumulative, integrated spike activity across channels fluctuating with joint position (top) and residual left forearm electromyographic activity (bottom).** The summed spike activity across channels and run through a leaky integrator<sup>19</sup> appeared to fluctuate with specific residual actions in the left upper extremity. More proximal residual activity in the biceps and triceps generated a more normal-appearing pattern: as seen between 290 and 310 seconds in the bottom panel, biceps (blue trace) and triceps (red trace) activity alternate. In the distal upper extremity, however, wrist flexor (green) and wrist extensor (yellow) trace, tend to occur together in an abnormal synergy; it is also evident that wrist flexor activity is likewise abnormally synergistic with biceps activity (an abnormal flexor synergy). The summed, integrated spiking activity across channels appears to fluctuate most consistently with wrist flexor activity.



429 Although the limited number of trials on various tasks reduced statistical power to compare myoelectric to BCI control,  
430 qualitatively there appeared to be a trend of faster control in the BCI mode. We speculate that this may be due to the  
431 fact that triggering orthosis action from direct cortical recordings does not activate abnormal forearm synergies in the  
432 same manner that myoelectric control appears to. Post-stroke spasticity is thought to represent a form of abnormal  
433 plasticity and loss of corticoreticular facilitation of the medullary inhibition center in turn leading to decreased  
434 inhibition from the dorsal reticulospinal tract on the spinal stretch reflex: the medial reticulospinal and vestibulospinal  
435 tracts are unopposed leading to stretch reflex hyperexcitability<sup>24</sup>. In the myoelectric mode, where hand closing is  
436 triggered by activation of residual wrist flexors, this hyperexcitability is inevitably triggered such that the orthosis  
437 motors have to ‘fight harder’ to open the hand, slowing that process. In the BCI mode, even if residual wrist flexor  
438 and extensor activity are engaged, it is to lesser degree such that abnormal tone is not elevated, and the orthosis motors  
439 can more easily and rapidly achieve hand actions.

440  
441 This pilot study implies that usable control signals are present in ipsilesional cerebral cortical activity. To be clinically  
442 scalable, future devices must be fully implantable to minimize infection risk. With the advent of fully implantable BCI  
443 (i.e., no percutaneous connectors,<sup>25,26,27</sup>), a wider range of stroke survivors could benefit. Although a fully implantable  
444 BCI could be coupled to an external wearable orthosis, an option that may gain even wider clinical adoption would be  
445 to couple direct cortical control to implantable functional electrical stimulation in the paretic arm, as has been  
446 demonstrated in at least one stroke survivor [17]. The combination of a fully implantable brain sensor with a fully  
447 implantable peripheral neuromuscular stimulation hence could be a potential solution to “unparalyze” the arm. Direct  
448 cortically driven peripheral muscular stimulation may have both rehabilitative<sup>28</sup> benefits when used intermittently  
449 and direct functional benefits if deployed continuously in daily life. Fully implantable brain-computer interfaces may  
450 represent a medical device opportunity to help stroke survivors break through their plateau in recovery and keep going  
451 to achieve greater functional independence.

452  
453 FUNDING

454  
455 This research was supported by philanthropy to the Farber Institute of Neuroscience at Thomas Jefferson University.  
456

457 ETHICS COMMITTEE APPROVAL

458  
459 This research was approved, and remains in approved status, by the Institutional Review Board of Thomas Jefferson  
460 University, protocol number 17D.459.

461  
462 CONFLICT OF INTEREST STATEMENT

463  
464 Drs. Serruya and Napoli are inventors on a US provisional patent application that has been filed by Thomas Jefferson  
465 University on the methods described in this paper. All authors report that they do not have any conflicts of interest  
466 with the research described.

467  
468 ACKNOWLEDGEMENTS

469  
470 The authors would like to thank the following people for their assistance and input: Erica Jones, Shivayogi Hiremath,  
471 Christopher Thompson, Carlos Vargas-Irwin, John Donoghue, Nicholas Hatsopoulos, David Weisman, Kristofer  
472 Feeko, M.J. Mulcahey, Joseph Tracy, Diana Tzeng, Daniel Graves, Ashly Parekh, Joely Mass, Thomas J. Kelly, IV,  
473 Stephen Valverde, Allison Weiss, Shaista Alam, Robin Dharia, Elan Miller, Lisa Bowman, Rodney Bell, Michael  
474 Sperling, and the participant and his mother.

475  
476 REFERENCES

477  
478 1. Katan, M. & Luft, A. Global Burden of Stroke. *Semin. Neurol.* (2018). doi:10.1055/s-0038-1649503  
479 2. Vos, T. *et al.* Global, regional, and national incidence, prevalence, and years lived with disability for 310  
480 diseases and injuries, 1990–2015: a systematic analysis for the Global Burden of Disease Study 2015.

- 481 *Lancet* (2016). doi:10.1016/S0140-6736(16)31678-6
- 482 3. Centers for Disease Control. *Prevalence of stroke--United States, 2006-2010. MMWR. Morbidity and*
- 483 *mortality weekly report* **61**, (2012).
- 484 4. Kwakkel, G., Kollen, B. J., Van der Grond, J. V. & Prevo, A. J. H. Probability of regaining dexterity in the
- 485 flaccid upper limb: Impact of severity of paresis and time since onset in acute stroke. *Stroke* (2003).
- 486 doi:10.1161/01.STR.0000087172.16305.CD
- 487 5. Milekovic T, Sarma AA, Bacher D, Simeral JD, Saab J, Pandarinath C, S. B., Blabe C, Oakley EM, Tringale
- 488 KR, Eskandar E, Cash SS, Henderson JM, S. K. & Donoghue JP, H. L. Stable long-term BCI-enabled
- 489 communication in ALS and locked-in syndrome using LFP signals. *J Neurophysiol* (2018).
- 490 doi:10.1152/jn.00493.2017
- 491 6. Klaes, C. *et al.* A cognitive neuroprosthetic that uses cortical stimulation for somatosensory feedback. *J.*
- 492 *Neural Eng.* **11**, 056024 (2014).
- 493 7. Collinger, J. L. *et al.* High-performance neuroprosthetic control by an individual with tetraplegia. *Lancet*
- 494 **381**, 557–564 (2013).
- 495 8. Bhagat, N. A. *et al.* Design and optimization of an EEG-based brain machine interface (BMI) to an upper-
- 496 limb exoskeleton for stroke survivors. *Front. Neurosci.* **10**, (2016).
- 497 9. Page, S. J., Hill, V. & White, S. Portable upper extremity robotics is as efficacious as upper extremity
- 498 rehabilitative therapy: a randomized controlled pilot trial. *Clin. Rehabil.* **27**, 494–503 (2013).
- 499 10. Knutson, J. S. *et al.* Implanted neuroprosthesis for assisting arm and hand function after stroke: A case
- 500 study. *J. Rehabil. Res. Dev.* **49**, 1505 (2012).
- 501 11. Knutson, J. S. *et al.* Adding contralaterally controlled electrical stimulation of the triceps to contralaterally
- 502 controlled functional electrical stimulation of the finger extensors reduces upper limb impairment and
- 503 improves reachable workspace but not dexterity: A randomized . *Am. J. Phys. Med. Rehabil.* (2020).
- 504 doi:10.1097/PHM.0000000000001363
- 505 12. Wisneski, K. J. *et al.* Unique cortical physiology associated with ipsilateral hand movements and
- 506 neuroprosthetic implications. *Stroke* **39**, 3351–3359 (2008).
- 507 13. Knutson, J. S. *et al.* Implanted neuroprosthesis for assisting arm and hand function after stroke: a case study.
- 508 *J. Rehabil. Res. Dev.* **49**, 1505–16 (2012).
- 509 14. Bundy, D. T. *et al.* Using ipsilateral motor signals in the unaffected cerebral hemisphere as a signal platform
- 510 for brain-computer interfaces in hemiplegic stroke survivors. *J. Neural Eng.* **9**, 036011 (2012).
- 511 15. Suner, S., Fellows, M. R., Vargas-Irwin, C., Nakata, G. K. & Donoghue, J. P. Reliability of signals from a
- 512 chronically implanted, silicon-based electrode array in non-human primate primary motor cortex. *IEEE*
- 513 *Trans. Neural Syst. Rehabil. Eng.* **13**, 524–541 (2005).
- 514 16. Rousche, P. J. & Normann, R. A. A method for pneumatically inserting an array of penetrating electrodes
- 515 into cortical tissue. *Ann. Biomed. Eng.* (1992). doi:10.1007/BF02368133
- 516 17. Yozbatiran, N., Der-Yeghiaian, L. & Cramer, S. C. A standardized approach to performing the action
- 517 research arm test. *Neurorehabil. Neural Repair* (2008). doi:10.1177/1545968307305353
- 518 18. Taylor, N., Sand, P. L. & Jebsen, R. H. Evaluation of hand function in children. *Arch. Phys. Med. Rehabil.*
- 519 (1973).
- 520 19. Fetz, E. E. & Baker, M. A. Operantly conditioned patterns on precentral unit activity and correlated
- 521 responses in adjacent cells and contralateral muscles. *J. Neurophysiol.* (1973). doi:10.1152/jn.1973.36.2.179
- 522 20. Jebsen, R. H., Taylor, N., Trieschmann, R. B., Trotter, M. J. & Howard, L. A. An objective and standardized
- 523 test of hand function. *Arch. Phys. Med. Rehabil.* (1969).
- 524 21. Martin, E. G. & Lovett, R. W. A Method of Testing Muscular Strength in Infantile Paralysis. *J. Am. Med.*
- 525 *Assoc.* (1915). doi:10.1001/jama.1915.02580180016006
- 526 22. Fugl-Meyer, A. R., Jääskö, L., Leyman, I., Olsson, S. & Steglind, S. The post-stroke hemiplegic patient. 1. a
- 527 method for evaluation of physical performance. *Scand. J. Rehabil. Med.* (1975). doi:10.1038/35081184
- 528 23. Ashworth, B. Preliminary trial of carisoprodol in multiple sclerosis. *Practitioner* (1964).
- 529 24. Li, S. Spasticity, motor recovery, and neural plasticity after stroke. *Frontiers in Neurology* (2017).
- 530 doi:10.3389/fneur.2017.00120
- 531 25. Yin, M. *et al.* Wireless neurosensor for full-spectrum electrophysiology recordings during free behavior.
- 532 *Neuron* (2014). doi:10.1016/j.neuron.2014.11.010
- 533 26. Musk, E. An Integrated Brain-Machine Interface Platform With Thousands of Channels. *J. Med. Internet*
- 534 *Res.* (2019). doi:10.2196/16194
- 535 27. Kohler, F. *et al.* Closed-loop interaction with the cerebral cortex: a review of wireless implant technology§.
- 536 *Brain-Computer Interfaces* (2017). doi:10.1080/2326263X.2017.1338011

- 537 28. Olsen, S. *et al.* Peripheral Electrical Stimulation Paired With Movement-Related Cortical Potentials  
538 Improves Isometric Muscle Strength and Voluntary Activation Following Stroke. *Front. Hum. Neurosci.*  
539 (2020). doi:10.3389/fnhum.2020.00156  
540
